# Supplementary material for: Assisted transcriptome reconstruction and splicing orthology
Source: PubMed Central journal article supplement (PMC5123294; doi:10.1186/s12864-016-3103-6), 2016-11-11
Supplement: 12864_2016_3103_MOESM3_ESM.pdf [file 12864_2016_3103_MOESM3_ESM.pdf]

## Number of splicing orthologs

| Release              | Date     | No. Sequences | C1   | C2   | C3   | All  |
|----------------------|----------|---------------|------|------|------|------|
| 2                    | 10/10/06 | 13374         | 565  | 282  | 104  | 951  |
| 4                    | 11/28/07 | 17707         | 734  | 437  | 162  | 1333 |
| 7                    | 01/24/11 | 22187         | 923  | 666  | 283  | 1872 |
| 10                   | 08/14/12 | 22934         | 963  | 721  | 317  | 2001 |
| 13                   | 08/05/13 | 23093         | 963  | 725  | 321  | 2009 |
| 16                   | 04/07/14 | 23880         | 1019 | 770  | 363  | 2152 |
| 19                   | 07/30/15 | 24834         | 1073 | 826  | 413  | 2312 |
| Positive predictions |          |               | 1464 | 1404 | 1385 | 4253 |
